# Supplementary material for: TREM2 Recognition of Candidalysin Orchestrates Mucosal Immunity in Oropharyngeal Candidiasis
Source: Research Square preprint supplement (doi:10.21203/rs.3.rs-4137807/v1), 2024-04-01
Supplement: Supplementary file 1 [file 117b42a74b4ab9e5748fdc30.docx]

| REAGENT or RESOURCE | SOURCE | Product number |
| --- | --- | --- |
| Antibodies | | |
| eBioscience™ Fixable Viability Dye eFluor™ 450 | Thermo Fisher Scientific | Cat#65-0863-14; |
| FITC anti-mouse Lineage Cocktail with Isotype Ctrl | Biolegend | Cat#133301; |
| PE anti-mouse CD3 Antibody | Biolegend | Cat#100206; |
| Brilliant Violet 650™ anti-mouse CD4 Antibody | Biolegend | Cat#100546; |
| Brilliant Violet 510™ anti-mouse TCR γ/δ Antibody | Biolegend | Cat#118131; |
| Brilliant Violet 785™ anti-mouse CD90.2 (Thy1.2) Antibody | Biolegend | Cat#105331; |
| Brilliant Violet 605™ anti-mouse CD127 (IL-7Rα) Antibody | Biolegend | Cat#135025; |
| PerCP anti-mouse IL-17A Antibody | Biolegend | Cat#506944; |
| APC/Cyanine7 anti-mouse CD45 Antibody | Biolegend | Cat#103116; |
| PE/Dazzle™ 594 anti-mouse IFN-γ Antibody | Biolegend | Cat#505846; |
| eBioscience™ Fixable Viability Dye eFluor™ 506 | Thermo Fisher Scientific | Cat#65-0866-14; |
| PerCP/Cyanine5.5 anti-mouse CD45 Antibody | Biolegend | Cat#103132; |
| Ly-6C Monoclonal Antibody (HK1.4), eFluor™ 450, eBioscience™ | Thermo Fisher Scientific | Cat#48-5932-82; |
| Brilliant Violet 605™ anti-mouse Ly-6G Antibody | Biolegend | Cat#127639; |
| FITC anti-mouse/human CD11b Antibody | Biolegend | Cat#101206; |
| PE anti-mouse CD11c Antibody | Biolegend | Cat#117308; |
| MHC Class II (I-A/I-E) Monoclonal Antibody (M5/114.15.2), APC-eFluor™ 780, eBioscience™ | Thermo Fisher Scientific | Cat#47-5321-82; |
| APC anti-mouse F4/80 Antibody | Biolegend | Cat#123116; |
| Brilliant Violet 650™ anti-mouse CD117 (c-kit) Antibody | Biolegend | Cat#105853; |
| Alexa Fluor® 700 anti-mouse FcεRIα Antibody | Biolegend | Cat#134323; |
| PE/Dazzle™ 594 anti-mouse CD170 (Siglec-F) Antibody | Biolegend | Cat#155530; |
| InVivoMAb anti-mouse CD28 | Bioxcell | Cat#BE0328; |
| InVivoMAb anti-mouse CD3ε | Bioxcell | Cat#BE0001-1; |
| CX3CR1 Recombinant Rabbit Monoclonal Antibody (1H14L7) | Thermo Fisher Scientific | Cat#702321; |
| Ki-67 Monoclonal Antibody (SolA15), eBioscience™ | Thermo Fisher Scientific | Cat#14-5698-80; |
| Anti-Histone H3 (citrulline R2 + R8 + R17) antibody | Abcam | Cat#ab5103; |
| Human/Mouse TREM2 Antibody | R&D Systems | Cat#MAB17291; |
| Human/Mouse Myeloperoxidase/MPO Antibody | R&D Systems | Cat#AF3667; |
| F4/80 Polyclonal antibody | Proteintech | Cat#28463-1-AP; |
| TNF Alpha Monoclonal antibody | Proteintech | Cat#60291-1-Ig; |
| Annexin V Monoclonal antibody | Proteintech | Cat#66245-1-Ig; |
| Phospho-GSK3B (Ser9) Monoclonal antibody | Proteintech | Cat#67558-1-Ig; |
| GSK3B Polyclonal antibody | Proteintech | Cat#24198-1-AP; |
| Phospho-Akt (Ser473) (D9E) XP® Rabbit mAb | Cell Signaling Technology | Cat#4060; |
| AKT Monoclonal antibody | Proteintech | Cat#60203-2-Ig; |
| Phospho-Zap-70 (Tyr319)/Syk (Tyr352) (65E4) Rabbit mAb | Cell Signaling Technology | Cat#2717; |
| SYK Monoclonal antibody | Proteintech | Cat#66721-1-Ig; |
| NF-κB p65 Recombinant antibody | Proteintech | Cat#80979-1-RR; |
| Phospho-NF-κB p65 (Ser536)(93H1) Rabbit mAb | Cell Signaling Technology | Cat#3033; |
| Phospho-IκBα (Ser32/36) (5A5)Mouse mAb | Cell Signaling Technology | Cat#9246; |
| IkB Alpha Monoclonal antibody | Proteintech | Cat#66418-1-Ig; |
| Recombinant Anti-IKB alpha(phospho S32) antibody | Abcam | Cat#ab92700; |
| Recombinant Anti-IKB alpha(phospho S36) antibody | Abcam | Cat#ab133462; |
| Phospho-ERK1/2 (Thr202/Tyr204)Polyclonal antibody | Proteintech | Cat#28733-1-AP; |
| ERK1/2 Polyclonal antibody | Proteintech | Cat#51068-1-AP; |
| Phospho-p38 MAPK (Thr180/Tyr182)Polyclonal antibody | Proteintech | Cat#28796-1-AP; |
| p38 MAPK Polyclonal antibody | Proteintech | Cat#14064-1-AP; |
| Phospho-SAPK/JNK (Thr183/Tyr185)(81E11) Rabbit mAb | Cell Signaling Technology | Cat#4668; |
| JNK Monoclonal antibody | Proteintech | Cat#66210-1-Ig; |
| Beta Actin Recombinant antibody | Proteintech | Cat#81115-1-RR; |
| DYKDDDDK tag Polyclonal antibody(Binds to FLAG® tag epitope) | Proteintech | Cat#20543-1-AP; |
| TREM2 (D8I4C) Rabbit mAb | Cell Signaling Technology | Cat#91068S; |
| PE anti-His Tag Antibody | BioLegend | Cat#362603; |
| Chemicals, peptides, and recombinant proteins | | |
| Candidalysin | Apeptide | Cat#AP201224-3 |
| Recombinant Human TGF-β1 (HEK293 derived) | Peprotech | Cat#100-21 |
| HSP60 Protein, Mouse (His) | MedChemExpress | Cat#HY-P73916 |
| TNF-alpha/TNFSF2 Protein, Mouse (P. pastoris) | MedChemExpress | Cat#HY-P7090A |
| TREM-2 Protein, Mouse (HEK293, His) | MedChemExpress | Cat#HY-P71381 |
| Recombinant Murine M-CSF | Peprotech | Cat#315-02 |
| Collagenase IV | YEASEN | Cat#40510ES60 |
| DMEM (Dulbecco's Modified Eagle Medium) | Gibco | Cat#11995065 |
| Roswell Park Memorial Institute (RPMI) 1640 | Gibco | Cat#11875093 |
| PBS，pH 7.4 | Gibco | Cat#10010023 |
| Mounting Medium With DAPI - Aqueous, Fluoroshield | Abcam | Cat#ab104139 |
| NucleoZOL, one phase RNA purification | Macherey Nagel | Cat#740404.200 |
| Recombinant Murine TNF-α | Peprotech | Cat#315-01A |
| RIPA lysis buffer (strong, without inhibitors) | Beyotime | Cat#P0013K |
| DCFH-DA (10mM) | Beyotime | Cat#S0033S |
| Fetal Bovine Serum (FBS), Collected in South America | Capricorn Scientific | Cat#FBS-12A |
| BSA Albumin Bovine V | Biosharp | Cat#BS114-100g |
| Penicillin&Streptomycin (10,000 U/mL) | Gibco | Cat#15140122 |
| HBSS | Thermo Fisher Scientific | Cat#14175095 |
| TRYPSIN 0.25% EDTA | Thermo Fisher Scientific | Cat#25300054 |
| 6×Protein Loading Buffer | TransGen Biotech | Cat#DL101-02 |
| Recombinant Cynomolgus TREM2 (C-6His) | Novoprotein | Cat#C15R |
| DEPC | Beyotime Biotechnology | Cat#ST036 |
| YPD/YEPD | Shanghai yuanye Bio-Technology Co., Ltd | Cat#R20146 |
| Cortisone Acetate | Solarbio | Cat#SC6020 |
| Dispase II | Gibco | Cat#17105041 |
| EDTA (0.5 M), pH 8.0 | Quality Biological | Cat#351-027-101 |
| eBioscience™ 1X red blood cell lysis buffer | Thermo Fisher | Cat#00-4333-57 |
| Normal saline | Solarbio | Cat#IN9000 |
| Paraformaldehyde,4％ | Solarbio | Cat#P1110 |
| Sodium Citrate buffer(0.01mol/L, pH6.0, powder) | Solarbio | Cat#C1010 |
| Neutral Buffered Formalin Fixative, 10% | Solarbio | Cat#G2161 |
| Neomyein Sulfate | Solarbio | Cat#N8090 |
| NON-FatPowderedMilk | Solarbio | Cat#D8340 |
| Fc Receptor Blocking Solution | Biolegend | Cat#422301 |
| Protein A/G PLUS-Agarose | Santa Cruz Biotechnology | Cat#sc-2003 |
| Pyridine | Sangon Biotech | Cat#A606157 |
| Ammonium hydroxide solution | Macklin | Cat#A801005 |
| Tris (Hydroxymethyl) Aminomethane | Solarbio | Cat#77-86-1 |
| Chloroform | Macklin | Cat#821112 |
| Potassium hydroxide | Macklin | Cat#P816399 |
| TREM-2 Protein, Human (HEK293, His) | MedChemExpress | Cat#HY-P70534 |
| Advanced DNA RNA Transfection Reagent | Zeta Life | Cat#AD600025 |
| His Tag Antibody(HRP),Mouse MAb | Sino Biological | Cat#105327 |
| Zymosan Depleted | Invivogen | Cat#tlrl-zyd |
| Laminarin | Invivogen | Cat#tlrl-lam |
| Curdlan | Invivogen | Cat#tlrl-curd |
| prepared by alkaline extraction | Siqma-Aldrich | Cat#M7504 |
| Protease and phosphatase inhibitor cocktail for general use, MS-safe, 50X | Beyotime Biotechnology | Cat#P1049 |
| Isopropanol | Sangon Biotech | Cat#67-63-0 |
| Ethanol absolute | Sangon Biotech | Cat#64-17-5 |
| TBST（pH8.0, 10x） | CoWin Biosciences | Cat#CW0043 |
| Stripping Buffer | CoWin Biosciences | Cat#CW0056 |
| NcmBlot Rapid Transfer Buffer | New Cell&Molecular Biotech Co.,Ltd | Cat#WB4600 |
| DNase I | Solarbio | Cat#D8071 |
| RIPA Buffer (10X) | Cell Signaling Technology | Cat#9806 |
| Critical commercial assays | | |
| PrimeScript™ RT reagent Kit with gDNA Eraser (Perfect Real Time) | Takara | Cat#RR047A |
| TB Green® Premix Ex Taq™(Tli RNaseH Plus) | Takara | Cat#RR420A |
| BD Cytofix/Cytoperm™ Fixation/Permeabilization Kit | BD Biosciences | Cat#554714 |
| Pierce™ BCA Protein Assay Kit | Thermo Fisher | Cat#23227 |
| Isolation of Neutrophils Kit | Solarbio | Cat#P8550 |
| Naive CD4+ T Cell Isolation Kit,mouse | Miltenyi | Cat#130-104-453 |
| Universal Developer and Fixer Kit | Biosharp | Cat#BL161A |
| Dead Cell Removal Kit | Miltenyi Biotec | Cat#130-090-101 |
| Periodic Acid Schiff (PAS) Stain Kit, with Hematoxylin | Solarbio | Cat#G1281 |
| eBioscience™ Cell Stimulation Kit (500X) | Thermo Fisher | Cat#00-4970-03 |
| Lipofectamine™ 3000 | Thermo Fisher | Cat#L3000150 |
| Deposited data | | |
| ScRNA-seq for mice OPC | This paper | Genome Sequence Archive(GSA:CRA014588) |
| Experimental models: Cell lines | | |
| Cell: 293T/17 | Pricella | Cat#CL-0469 |
| Cell: THP-1 | HyCyte™ | Cat#TCH-C361 |
| Experimental models: Organisms/strains | | |
| Candida albicans: SC5314 | Laboratory of Ruoyu Li | N/A |
| Mouse: C57BL/6J | Guangzhou Ruige Biological Technology Co.,Ltd | Cat#C57009 |
|  |  |  |
| Mouse: Trem2-/- | Cyagen | Quote: KOAIP210712MG1 |
| Oligonucleotides | | |
| Primer: *Gapdh* qPCR; *Gapdh*-F  5’ – CATCACTGCCACCCAGAAGACTG – 3’ | IDT | N/A |
| Primer: *Gapdh* qPCR; *Gapdh*-R  5’ – ATGCCAGTGAGCTTCCCGTTCA – 3’ | IDT | N/A |
| Primer: *S100a7a* qPCR; *S100a7a*-F  5’ – GATAGTGTGCCTCGCTTCATGG – 3’ | IDT | N/A |
| Primer: *S100a7a* qPCR; *S100a7a*-R  5’ – CTGGAGATGGTAGTCCTTCACC – 3’ | IDT | N/A |
| Primer: *S100a8* qPCR; *S100a8*-F  5’ – CAAGGAAATCACCATGCCCTCTA – 3’ | IDT | N/A |
| Primer: *S100a8* qPCR; *S100a8*-R  5’ – ACCATCGCAAGGAACTCCTCGA – 3’ | IDT | N/A |
| Primer: *S100a9* qPCR; *S100a9*-F  5’ –TGGTGGAAGCACAGTTGGCAAC – 3’ | IDT | N/A |
| Primer: *S100a9* qPCR; *S100a9*-R  5’ – CAGCATCATACACTCCTCAAAGC – 3’ | IDT | N/A |
| Primer: *Cxcl1* qPCR; *Cxcl1*-F  5’ – GACTCCAGCCACACTCCAAC – 3’ | IDT | N/A |
| Primer: *Cxcl1* qPCR; *Cxcl1*-R  5’ – TGACAGCGCAGCTCATTG – 3’ | IDT | N/A |
| Primer: *Cxcl2* qPCR; *Cxcl2*-F  5’ – CATCCAGAGCTTGAGTGTGACG – 3’ | IDT | N/A |
| Primer: *Cxcl2* qPCR; *Cxcl2*-R  5’ – GGCTTCAGGGTCAAGGCAAACT – 3’ | IDT | N/A |
| Primer: *Defb1* qPCR; *Defb1*-F  5’ – GGTGTTGGCATTCTCACAAGT – 3’ | IDT | N/A |
| Primer: *Defb1* qPCR; *Defb1*-R  5’ – TGGAGCGGAGACAGAATCC – 3’ | IDT | N/A |
| Primer: *Ccl2* qPCR; *Ccl2*-F  5’ – GCTACAAGAGGATCACCAGCAG – 3’ | IDT | N/A |
| Primer: *Ccl2* qPCR; *Ccl2*-R  5’ – GTCTGGACCCATTCCTTCTTGG – 3’ | IDT | N/A |
| Primer: *Ccl7* qPCR; *Ccl7*-F  5’ – CAGAAGGATCACCAGTAGTCGG – 3’ | IDT | N/A |
| Primer: *Ccl7* qPCR; *Ccl7*-R  5’ – ATAGCCTCCTCGACCCACTTCT – 3’ | IDT | N/A |
| Primer: *TNFA* qPCR; *TNFA*-F  5’ – GGTGCCTATGTCTCAGCCTCTT – 3’ | IDT | N/A |
| Primer: *mTNFA* qPCR; *mTNFA*-R  5’ – GCCATAGAACTGATGAGAGGGAG – 3’ | IDT | N/A |
| SiRNA: mouse-siDAP10-1; siDAP10-1-F  5’ – GCGGUCAUGUCACUCCUAATT – 3’ | Tsingke | N/A |
| SiRNA: mouse-siDAP10-1; siDAP10-1-R  5’ – UUAGGAGUGACAUGACCGCTT – 3’ | Tsingke | N/A |
| SiRNA: mouse-siTYROBP-1; siTYROBP-1-F  5’ – GACUGUGGGAGGAUUAAGUTT – 3’ | Tsingke | N/A |
| SiRNA: mouse-siTYROBP-1; siTYROBP-1-R  5’ – ACUUAAUCCUCCCACAGUCTT – 3’ | Tsingke | N/A |
| Software and algorithms | | |
| Cellranger | 10 x GENOMICS | https://www.10xgenomics.com/support/software/cell-ranger |
| Seurat | Hao, et al. | https://satijalab.org/seurat/ |
| Cellchat | Suoqin Jin et al. | https://github.com/sqjin/CellChat |
| Metascape | Zhou et al. | https://metascape.org/gp/index.html#/main/step1 |
| Rmagic | David van Dijk et al. | https://github.com/cran/Rmagic |
| ClusterGVis | Jun Zhang et al. | https://github.com/junjunlab/ClusterGVis |
